# Supplementary material for: Fatigue numeric rating scale validity, discrimination and responder definition in patients with psoriatic arthritis
Source: PubMed Central journal article supplement — RMD Open. 2020 Jan 7;6(1):e000928. doi: 10.1136/rmdopen-2019-000928 (PMC7046948; doi:10.1136/rmdopen-2019-000928), 2020-01-07
Supplement: rmdopen-2019-000928supp001.pdf [file rmdopen-2019-000928supp001.pdf]

RMD Open  
Rheumatic & Musculoskeletal Disease

### Supplemental Table 1

Correlations between Fatigue Numeric Rating Scale score and other outcomes at baseline and weeks 12 and 24, intent-to-treat population, last observation carried forward<sup>a</sup>

|                                 | SPIRIT-P1  |                              |                                   | SPIRIT-P2  |                              |                                   |
|---------------------------------|------------|------------------------------|-----------------------------------|------------|------------------------------|-----------------------------------|
|                                 | Time Point | Pearson Correlation (95% CI) | Level of Correlation <sup>b</sup> | Time Point | Pearson Correlation (95% CI) | Level of Correlation <sup>b</sup> |
| <b>mCPDAI</b>                   | Baseline   | 0.29 (0.19, 0.37)            | Fair                              | Baseline   | 0.31 (0.22, 0.40)            | Fair                              |
|                                 | Week 12    | 0.28 (0.10, 0.45)            | Fair                              | Week 12    | 0.51 (0.43, 0.59)            | Moderate                          |
|                                 | Week 24    | 0.48 (0.39, 0.55)            | Moderate                          | Week 24    | 0.53 (0.45, 0.61)            | Moderate                          |
| <b>SF-36 Role Emotional</b>     | Baseline   | -0.43 (-0.50, -0.34)         | Moderate                          | Baseline   | -0.42 (-0.51, -0.33)         | Moderate                          |
|                                 | Week 12    | -0.43 (-0.50, -0.35)         | Moderate                          | Week 12    | -0.40 (-0.48, -0.31)         | Fair/Moderate                     |
|                                 | Week 24    | -0.43 (-0.50, -0.34)         | Moderate                          | Week 24    | -0.47 (-0.55, -0.39)         | Moderate                          |
| <b>SF-36 Social Functioning</b> | Baseline   | -0.47 (-0.54, -0.39)         | Moderate                          | Baseline   | -0.52 (-0.59, -0.44)         | Moderate                          |
|                                 | Week 12    | -0.54 (-0.61, -0.47)         | Moderate                          | Week 12    | -0.58 (-0.64, -0.51)         | Moderate                          |
|                                 | Week 24    | -0.54 (-0.60, -0.46)         | Moderate                          | Week 24    | -0.59 (-0.65, -0.52)         | Moderate                          |

RMD Open  
Rheumatic & Musculoskeletal Disease

|                                   |          | SPIRIT-P1            |                          | SPIRIT-P2 |                      |               |
|-----------------------------------|----------|----------------------|--------------------------|-----------|----------------------|---------------|
| <b>DAPSA</b>                      | Baseline | 0.31 (0.22, 0.39)    | Fair                     | Baseline  | 0.40 (0.31, 0.48)    | Fair/Moderate |
|                                   | Week 12  | 0.55 (0.48, 0.61)    | Moderate                 | Week 12   | 0.48 (0.40, 0.56)    | Moderate      |
|                                   | Week 24  | 0.54 (0.47, 0.61)    | Moderate                 | Week 24   | 0.47 (0.39, 0.55)    | Moderate      |
| <b>SF-36 Role Physical</b>        | Baseline | -0.51 (-0.58, -0.43) | Moderate                 | Baseline  | -0.56 (-0.63, -0.49) | Moderate      |
|                                   | Week 12  | -0.58 (-0.64, -0.51) | Moderate                 | Week 12   | -0.61 (-0.67, -0.54) | Substantial   |
|                                   | Week 24  | -0.59 (-0.65, -0.52) | Moderate                 | Week 24   | -0.62 (-0.68, -0.55) | Substantial   |
| <b>SF-36 Physical Functioning</b> | Baseline | -0.56 (-0.63, -0.49) | Moderate                 | Baseline  | -0.52 (-0.59, -0.44) | Moderate      |
|                                   | Week 12  | -0.61 (-0.67, -0.55) | Substantial              | Week 12   | -0.61 (-0.67, -0.54) | Substantial   |
|                                   | Week 24  | -0.60 (-0.66, -0.53) | Moderate/<br>Substantial | Week 24   | -0.61 (-0.67, -0.54) | Substantial   |
| <b>HAQ-DI</b>                     | Baseline | 0.61 (0.55, 0.67)    | Substantial              | Baseline  | 0.51 (0.43, 0.58)    | Moderate      |
|                                   | Week 12  | 0.62 (0.56, 0.68)    | Substantial              | Week 12   | 0.61 (0.54, 0.67)    | Substantial   |
|                                   | Week 24  | 0.61 (0.54, 0.66)    | Substantial              | Week 24   | 0.64 (0.57, 0.69)    | Substantial   |

RMD Open  
Rheumatic & Musculoskeletal Disease

|                              |          | SPIRIT-P1            |             | SPIRIT-P2 |                      |             |
|------------------------------|----------|----------------------|-------------|-----------|----------------------|-------------|
| <b>PGA</b>                   | Baseline | 0.46 (0.38, 0.53)    | Moderate    | Baseline  | 0.34 (0.25, 0.43)    | Fair        |
|                              | Week 12  | 0.64 (0.58, 0.70)    | Substantial | Week 12   | 0.61 (0.54, 0.67)    | Substantial |
|                              | Week 24  | 0.64 (0.58, 0.70)    | Substantial | Week 24   | 0.67 (0.61, 0.72)    | Substantial |
| <b>PASDAS</b>                | Baseline | 0.50 (0.42, 0.57)    | Moderate    | Baseline  | 0.44 (0.35, 0.53)    | Moderate    |
|                              | Week 12  | 0.64 (0.58, 0.70)    | Substantial | Week 12   | 0.62 (0.55, 0.68)    | Substantial |
|                              | Week 24  | 0.65 (0.59, 0.71)    | Substantial | Week 24   | 0.66 (0.59, 0.71)    | Substantial |
| <b>Joint Pain</b>            | Baseline | 0.50 (0.42, 0.57)    | Moderate    | Baseline  | 0.47 (0.39, 0.55)    | Moderate    |
|                              | Week 12  | 0.65 (0.59, 0.71)    | Substantial | Week 12   | 0.67 (0.61, 0.72)    | Substantial |
|                              | Week 24  | 0.66 (0.60, 0.71)    | Substantial | Week 24   | 0.69 (0.63, 0.74)    | Substantial |
| <b>SF-36 Vitality Domain</b> | Baseline | -0.63 (-0.69, -0.57) | Substantial | Baseline  | -0.64 (-0.70, -0.57) | Substantial |
|                              | Week 12  | -0.66 (-0.71, -0.60) | Substantial | Week 12   | -0.75 (-0.79, -0.70) | Substantial |
|                              | Week 24  | -0.71 (-0.75, -0.66) | Substantial | Week 24   | -0.76 (-0.80, -0.72) | Substantial |

<sup>a</sup>Analysis conducted on pooled cohort data within each trial. Missing data at weeks 12 and 24 were imputed using last observation carried forward analysis.

<sup>b</sup>According to Sackett's conventions: Poor [0.0–0.2], Fair [0.2–0.4], Moderate [0.4–0.6], Substantial [0.6–0.8], and Excellent [0.8–1.0].

RMD Open  
Rheumatic & Musculoskeletal Disease

CI: confidence interval; DAPSA: Disease Activity Index for Psoriatic Arthritis; HAQ-DI: Health Assessment Questionnaire-Disability Index;

mCPDAI: Modified Composite Psoriatic Disease Activity Index; PGA: Patient Global Assessment; SF-36: Short-Form 36.
