# Supplementary material for: Fatigue numeric rating scale validity, discrimination and responder definition in patients with psoriatic arthritis
Source: PubMed Central journal article supplement — RMD Open. 2020 Jan 7;6(1):e000928. doi: 10.1136/rmdopen-2019-000928 (PMC7046948; doi:10.1136/rmdopen-2019-000928), 2020-01-07
Supplement: rmdopen-2019-000928supp002.pdf [file rmdopen-2019-000928supp002.pdf]

RMD Open  
Rheumatic & Musculoskeletal Disease

### Supplemental Table 2

Receiver operating characteristic analyses: similar patterns observed using other anchors, such as ACR50, MDA, and PsARC

Prediction Accuracy of Anchor Using Change in Fatigue NRS at week 24 (LOCF)

Intent-to-Treat Population

I1F-MC-RHAP Double-Blind Treatment Period

| Anchor | Change in Fatigue<br>NRS | Sensitivity | Specificity | Positive<br>Prediction | Negative<br>Prediction | Youden Index | Phi<br>Correlation |
|--------|--------------------------|-------------|-------------|------------------------|------------------------|--------------|--------------------|
| ACR20  | -8                       | 0.009       | 0.995       | 0.667                  | 0.464                  | 0.004        | 0.022              |
|        | -7                       | 0.042       | 0.995       | 0.900                  | 0.472                  | 0.036        | 0.116              |
|        | -6                       | 0.111       | 0.995       | 0.960                  | 0.491                  | 0.106        | 0.218              |
|        | -5                       | 0.213       | 0.973       | 0.902                  | 0.516                  | 0.186        | 0.279              |
|        | -4                       | 0.310       | 0.914       | 0.807                  | 0.533                  | 0.224        | 0.276              |
|        | -3                       | 0.454       | 0.828       | 0.754                  | 0.566                  | 0.282        | 0.300              |
|        | -2                       | 0.653       | 0.634       | 0.675                  | 0.611                  | 0.287        | 0.287              |
|        | -1                       | 0.806       | 0.478       | 0.642                  | 0.679                  | 0.284        | 0.302              |
|        | 0                        | 0.912       | 0.290       | 0.599                  | 0.740                  | 0.202        | 0.262              |
| ACR50  | -8                       | 0.014       | 0.996       | 0.667                  | 0.642                  | 0.010        | 0.055              |

RMD Open  
Rheumatic & Musculoskeletal Disease

Prediction Accuracy of Anchor Using Change in Fatigue NRS at week 24 (LOCF)

Intent-to-Treat Population

I1F-MC-RHAP Double-Blind Treatment Period

| <b>Anchor</b> | <b>Change in Fatigue<br/>NRS</b> | <b>Sensitivity</b> | <b>Specificity</b> | <b>Positive<br/>Prediction</b> | <b>Negative<br/>Prediction</b> | <b>Youden Index</b> | <b>Phi<br/>Correlation</b> |
|---------------|----------------------------------|--------------------|--------------------|--------------------------------|--------------------------------|---------------------|----------------------------|
|               | -7                               | 0.055              | 0.992              | 0.800                          | 0.651                          | 0.047               | 0.146                      |
|               | -6                               | 0.145              | 0.984              | 0.840                          | 0.671                          | 0.129               | 0.257                      |
|               | -5                               | 0.262              | 0.949              | 0.745                          | 0.695                          | 0.211               | 0.305                      |
|               | -4                               | 0.379              | 0.891              | 0.663                          | 0.718                          | 0.270               | 0.321                      |
|               | -3                               | 0.531              | 0.794              | 0.592                          | 0.750                          | 0.325               | 0.333                      |
|               | -2                               | 0.738              | 0.603              | 0.512                          | 0.803                          | 0.341               | 0.328                      |
|               | -1                               | 0.876              | 0.440              | 0.469                          | 0.863                          | 0.316               | 0.323                      |
|               | 0                                | 0.952              | 0.257              | 0.419                          | 0.904                          | 0.209               | 0.260                      |
| PsARC         | -8                               | 0.005              | 0.989              | 0.333                          | 0.446                          | -0.007              | -0.038                     |
|               | -7                               | 0.032              | 0.983              | 0.700                          | 0.452                          | 0.015               | 0.047                      |
|               | -6                               | 0.095              | 0.978              | 0.840                          | 0.467                          | 0.072               | 0.149                      |

RMD Open  
Rheumatic & Musculoskeletal Disease

Prediction Accuracy of Anchor Using Change in Fatigue NRS at week 24 (LOCF)

Intent-to-Treat Population

I1F-MC-RHAP Double-Blind Treatment Period

|               | <b>Change in Fatigue</b> | <b>Sensitivity</b> | <b>Specificity</b> | <b>Positive</b>   | <b>Negative</b>   | <b>Youden Index</b> | <b>Phi</b>         |
|---------------|--------------------------|--------------------|--------------------|-------------------|-------------------|---------------------|--------------------|
| <b>Anchor</b> | <b>NRS</b>               |                    |                    | <b>Prediction</b> | <b>Prediction</b> |                     | <b>Correlation</b> |
|               | -5                       | 0.185              | 0.944              | 0.804             | 0.484             | 0.129               | 0.193              |
|               | -4                       | 0.284              | 0.889              | 0.759             | 0.502             | 0.173               | 0.212              |
|               | -3                       | 0.428              | 0.806              | 0.731             | 0.533             | 0.233               | 0.248              |
|               | -2                       | 0.635              | 0.622              | 0.675             | 0.580             | 0.257               | 0.256              |
|               | -1                       | 0.788              | 0.467              | 0.646             | 0.641             | 0.255               | 0.270              |
|               | 0                        | 0.896              | 0.278              | 0.605             | 0.685             | 0.174               | 0.225              |
| MDA-PASI      | -8                       | 0.017              | 0.996              | 0.667             | 0.707             | 0.013               | 0.070              |
|               | -7                       | 0.059              | 0.989              | 0.700             | 0.714             | 0.048               | 0.141              |
|               | -6                       | 0.134              | 0.968              | 0.640             | 0.727             | 0.103               | 0.194              |
|               | -5                       | 0.252              | 0.926              | 0.588             | 0.746             | 0.178               | 0.244              |
|               | -4                       | 0.361              | 0.859              | 0.518             | 0.762             | 0.220               | 0.248              |

RMD Open  
Rheumatic & Musculoskeletal Disease

Prediction Accuracy of Anchor Using Change in Fatigue NRS at week 24 (LOCF)

Intent-to-Treat Population

I1F-MC-RHAP Double-Blind Treatment Period

|                          | <b>Change in Fatigue</b> | <b>Sensitivity</b> | <b>Specificity</b> | <b>Positive</b>   | <b>Negative</b>   | <b>Youden Index</b> | <b>Phi</b>         |
|--------------------------|--------------------------|--------------------|--------------------|-------------------|-------------------|---------------------|--------------------|
| <b>Anchor</b>            | <b>NRS</b>               |                    |                    | <b>Prediction</b> | <b>Prediction</b> |                     | <b>Correlation</b> |
|                          | -3                       | 0.496              | 0.749              | 0.454             | 0.779             | 0.245               | 0.239              |
|                          | -2                       | 0.697              | 0.555              | 0.397             | 0.813             | 0.252               | 0.230              |
|                          | -1                       | 0.866              | 0.406              | 0.380             | 0.878             | 0.272               | 0.265              |
|                          | 0                        | 0.941              | 0.233              | 0.340             | 0.904             | 0.174               | 0.207              |
| HAQ-DI MCID <sup>a</sup> | -8                       | 0.012              | 0.995              | 0.667             | 0.542             | 0.007               | 0.038              |
|                          | -7                       | 0.047              | 0.995              | 0.889             | 0.552             | 0.042               | 0.137              |
|                          | -6                       | 0.124              | 0.990              | 0.913             | 0.571             | 0.114               | 0.235              |
|                          | -5                       | 0.237              | 0.960              | 0.833             | 0.597             | 0.196               | 0.291              |
|                          | -4                       | 0.361              | 0.915              | 0.782             | 0.628             | 0.276               | 0.336              |
|                          | -3                       | 0.491              | 0.814              | 0.692             | 0.653             | 0.305               | 0.324              |
|                          | -2                       | 0.686              | 0.618              | 0.604             | 0.699             | 0.304               | 0.304              |

RMD Open  
Rheumatic & Musculoskeletal Disease

Prediction Accuracy of Anchor Using Change in Fatigue NRS at week 24 (LOCF)

Intent-to-Treat Population

I1F-MC-RHAP Double-Blind Treatment Period

| <b>Anchor</b>         | <b>Change in Fatigue<br/>NRS</b> | <b>Sensitivity</b> | <b>Specificity</b> | <b>Positive<br/>Prediction</b> | <b>Negative<br/>Prediction</b> | <b>Youden Index</b> | <b>Phi<br/>Correlation</b> |
|-----------------------|----------------------------------|--------------------|--------------------|--------------------------------|--------------------------------|---------------------|----------------------------|
|                       | -1                               | 0.840              | 0.457              | 0.568                          | 0.771                          | 0.298               | 0.318                      |
|                       | 0                                | 0.941              | 0.281              | 0.526                          | 0.848                          | 0.222               | 0.289                      |
| PGA MCID <sup>b</sup> | -8                               | 0.008              | 0.994              | 0.667                          | 0.397                          | 0.002               | 0.011                      |
|                       | -7                               | 0.038              | 0.994              | 0.900                          | 0.405                          | 0.031               | 0.097                      |
|                       | -6                               | 0.100              | 0.994              | 0.960                          | 0.421                          | 0.094               | 0.189                      |
|                       | -5                               | 0.200              | 0.981              | 0.941                          | 0.447                          | 0.181               | 0.265                      |
|                       | -4                               | 0.300              | 0.930              | 0.867                          | 0.467                          | 0.230               | 0.277                      |
|                       | -3                               | 0.446              | 0.861              | 0.829                          | 0.506                          | 0.307               | 0.320                      |
|                       | -2                               | 0.658              | 0.690              | 0.763                          | 0.571                          | 0.348               | 0.341                      |
|                       | -1                               | 0.800              | 0.513              | 0.714                          | 0.628                          | 0.313               | 0.327                      |

RMD Open  
Rheumatic & Musculoskeletal Disease

Prediction Accuracy of Anchor Using Change in Fatigue NRS at week 24 (LOCF)

Intent-to-Treat Population

I1F-MC-RHAP Double-Blind Treatment Period

| <b>Anchor</b> | <b>Change in Fatigue<br/>NRS</b> | <b>Sensitivity</b> | <b>Specificity</b> | <b>Positive<br/>Prediction</b> | <b>Negative<br/>Prediction</b> | <b>Youden Index</b> | <b>Phi<br/>Correlation</b> |
|---------------|----------------------------------|--------------------|--------------------|--------------------------------|--------------------------------|---------------------|----------------------------|
|               | 0                                | 0.896              | 0.297              | 0.660                          | 0.653                          | 0.193               | 0.246                      |

<sup>a</sup>Evaluated among patients with HAQ-DI  $\geq 0.35$  at baseline.

<sup>b</sup>Evaluated among patients with PGA  $\geq 10$  at baseline.

ACR20: American College of Rheumatology 20% response rate; ACR50: American College of Rheumatology 50% response rate; HAQ-DI MCID: Health Assessment Questionnaire-Disability Index minimum clinically important difference; LOCF: last observation carried forward; MDA-PASI: minimal disease activity–Psoriasis Activity and Severity Index; NRS: Numeric Rating Scale; PGA: Patient Global Assessment; PsARC: Psoriatic Arthritis Response Criteria.

RMD Open  
Rheumatic & Musculoskeletal Disease

Supplemental Fig. 1. Fatigue Numeric Rating Scale

Please rate your fatigue (weariness, tiredness) by selecting the one number that describes your WORST level of fatigue during the past 24 hours.

|   |   |   |   |   |   |   |   |   |   |    |
|---|---|---|---|---|---|---|---|---|---|----|
| 0 | 1 | 2 | 3 | 4 | 5 | 6 | 7 | 8 | 9 | 10 |
|---|---|---|---|---|---|---|---|---|---|----|

No Fatigue

As bad as you can imagine
