# Supplementary material for: Fatigue numeric rating scale validity, discrimination and responder definition in patients with psoriatic arthritis
Source: PubMed Central journal article supplement — RMD Open. 2020 Jan 7;6(1):e000928. doi: 10.1136/rmdopen-2019-000928 (PMC7046948; doi:10.1136/rmdopen-2019-000928), 2020-01-07
Supplement: rmdopen-2019-000928supp003.pdf [file rmdopen-2019-000928supp003.pdf]

RMD Open  
Rheumatic & Musculoskeletal Disease

**Supplemental Fig. 1. Fatigue Numeric Rating Scale**

Please rate your fatigue (weariness, tiredness) by selecting the one number that describes your WORST level of fatigue during the past 24 hours.

|   |   |   |   |   |   |   |   |   |   |    |
|---|---|---|---|---|---|---|---|---|---|----|
| 0 | 1 | 2 | 3 | 4 | 5 | 6 | 7 | 8 | 9 | 10 |
|---|---|---|---|---|---|---|---|---|---|----|

No Fatigue

As bad  
as you can imagine
